# Supplementary material for: Insight on the Structure-to-Activity of Carbosilane Metallodendrimers in the Fight against Staphylococcus aureus Biofilms
Source: MDPI journal article supplement (doi:10.3390/antibiotics10050589), 2021-05-17
Supplement: s1 [file s1]

Submitted to Pharmaceutics

Article type: regular article

## SUPPLEMENTARY INFORMATION

# Structural design of carbosilane metallodendrimers to modulate the antibacterial effect against *Staphylococcus aureus* biofilms

Celia Llamazares<sup>1</sup>, Natalia Sanz del Olmo<sup>2</sup>, Juan Soliveri<sup>1</sup>, F. Javier de la Mata<sup>2,3,4</sup>, José Luis Copa-Patiño<sup>1</sup>, and Sandra García-Gallego<sup>2,3,4\*</sup>

<sup>1</sup> University of Alcalá, Department of Biomedicine and Biotechnology, Madrid, Spain; celia.llamazares@hotmail.es (C.L.); juan.soliveri@uah.es (J.S.); josel.copa@uah.es (J.L.C.-P.)

<sup>2</sup> University of Alcalá, Research Institute in Chemistry “Andrés M. del Río” (IQAR) and Faculty of Science, Department of Organic and Inorganic Chemistry, Madrid, Spain; n.sanzdelolmo@gmail.com (N.S.O.); javier.delamata@uah.es (J.d.M.); sandra.garciagallego@uah.es (S.G.G.)

<sup>3</sup> Networking Research Center on Bioengineering, Biomaterials and Nanomedicine (CIBER-BBN), Spain.

<sup>4</sup> Institute Ramón y Cajal for Health Research (IRYCIS), Spain.

\* Correspondence: sandra.garciagallego@uah.es (S.G.G.).

## Table of Contents

**Figure S1.**  $^1\text{H}$ -NMR and  $^{13}\text{C}$ -NMR of metallodendrimer **1-Me**.....2

**Figure S2.**  $^1\text{H}$ -NMR and  $^{13}\text{C}$ -NMR of metallodendrimer **1-OMe**.....3

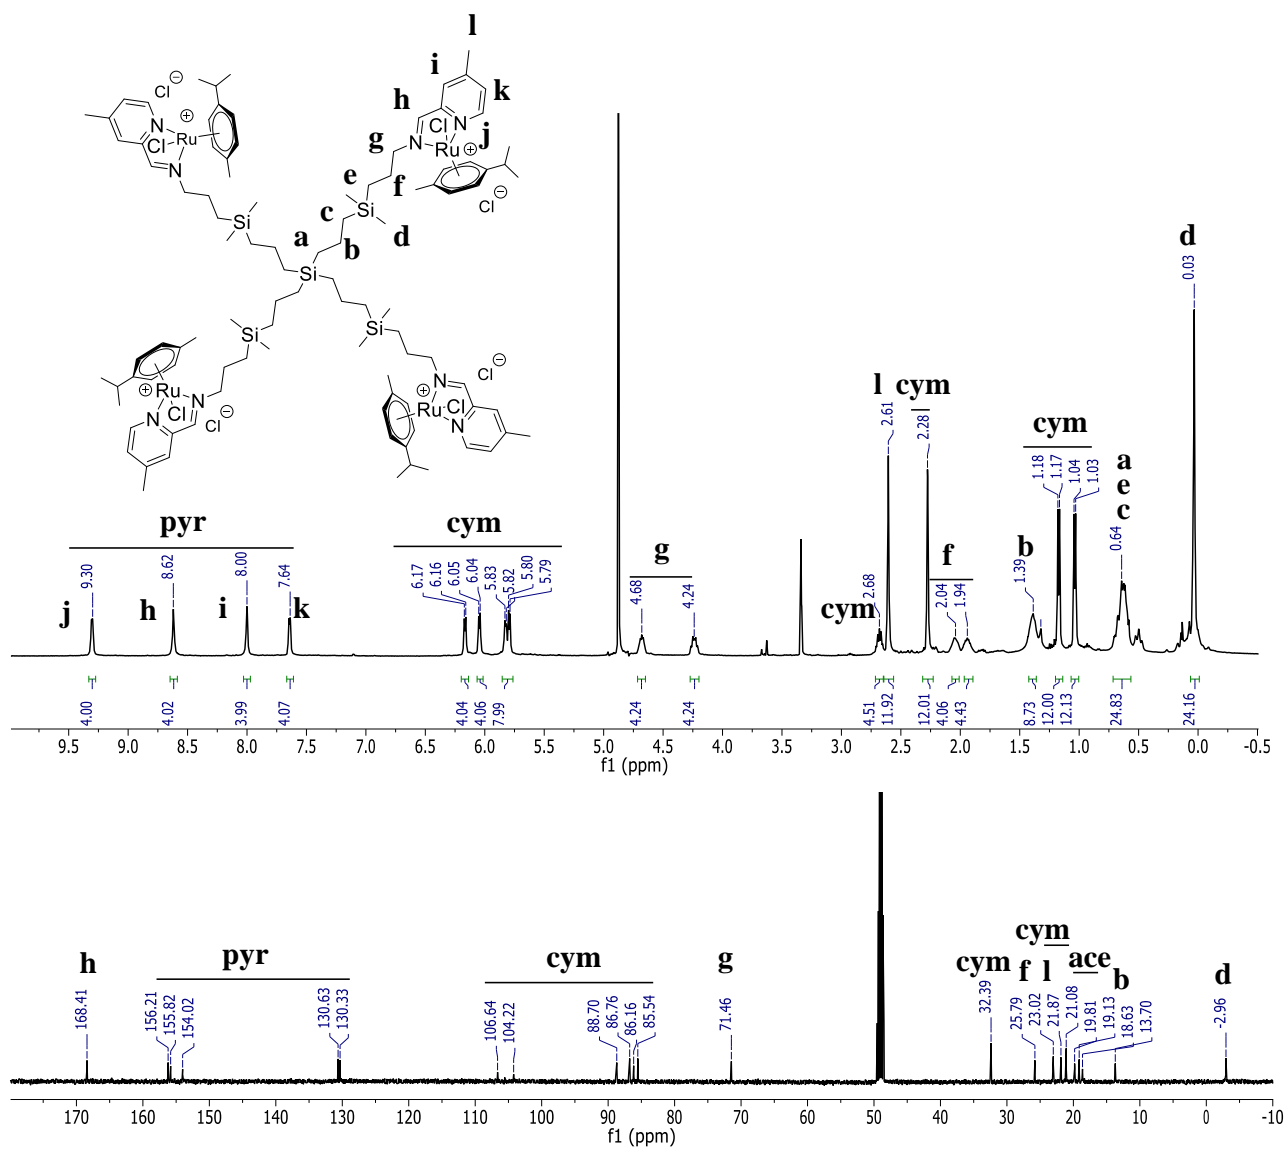

**Figure S1.**  $^1\text{H}$ -NMR and  $^{13}\text{C}$ -NMR (500MHz,  $\text{CD}_3\text{OD}$ ) of metallodendrimer **1-Me**.

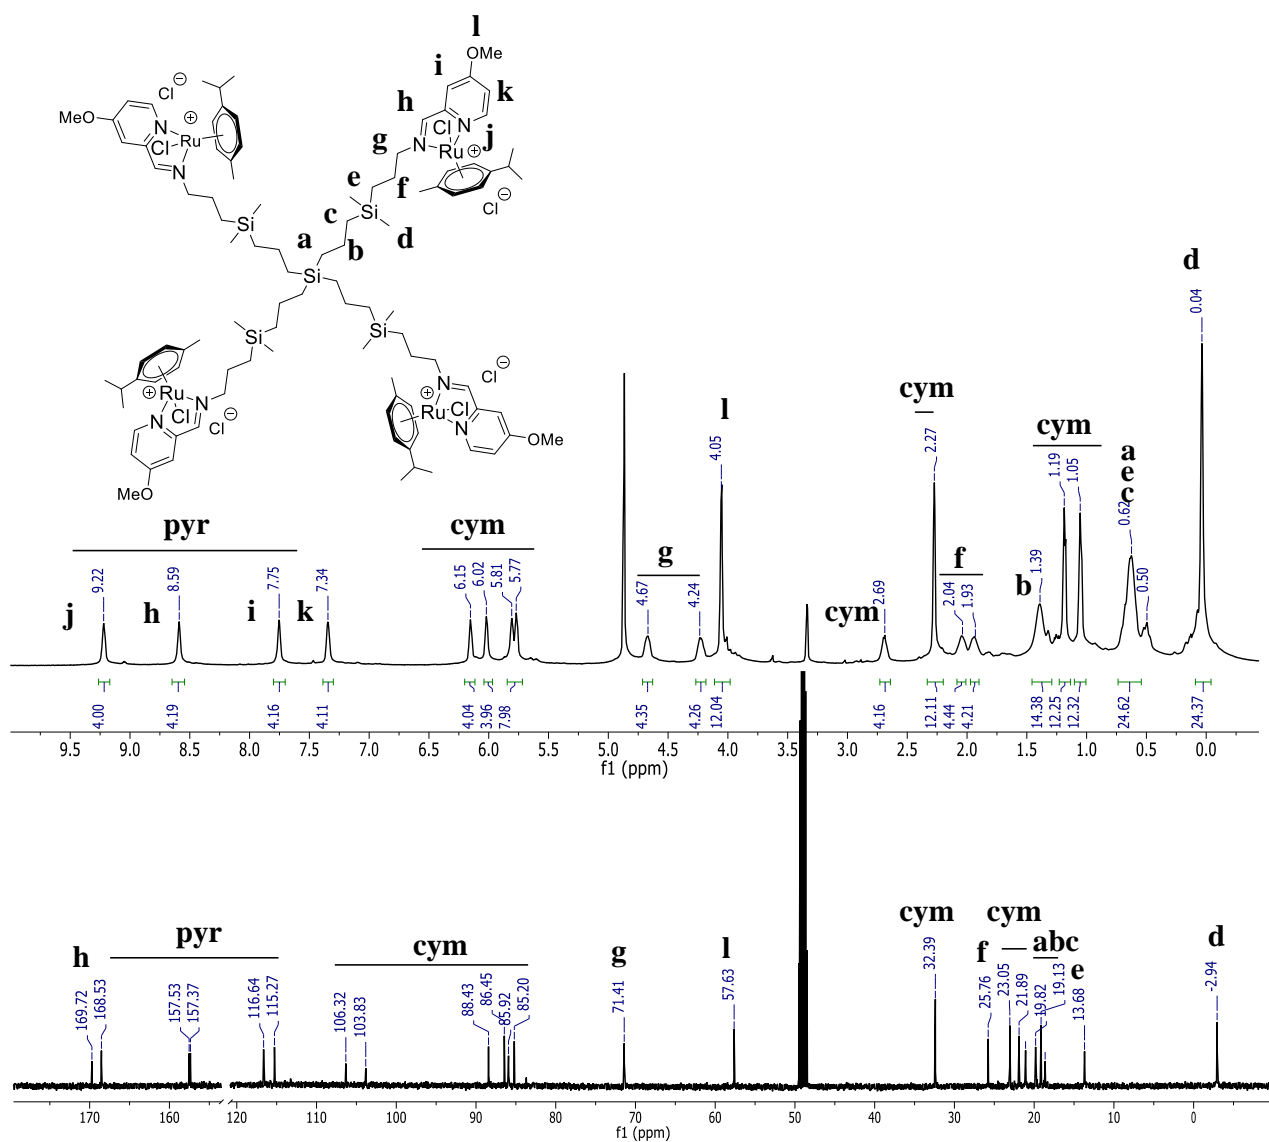

**Figure S2.** <sup>1</sup>H-NMR and <sup>13</sup>C-NMR (500MHz, CD<sub>3</sub>OD) of metallodendrimer **1-OMe**.
